# Supplementary material for: Association of Aberrant DNA Methylation Level in the CD4 and JAK-STAT-Pathway-Related Genes with Mastitis Indicator Traits in Chinese Holstein Dairy Cattle
Source: MDPI journal article supplement (doi:10.3390/ani12010065), 2021-12-29
Supplement: s1 [file s1]

**Table S1.** Information of primers used for real-time PCR.

| <b>Gene</b>          | <b>mRNA Primer Sequencing</b>  | <b>Product length (bp)</b> |
|----------------------|--------------------------------|----------------------------|
| <b><i>JAK2</i></b>   | Forward: TGAAGACCGAGACCCTACAC  | 212                        |
|                      | Reverse: CTGCAAGGATTTAAGGATTTC |                            |
| <b><i>STAT5A</i></b> | Forward: GGTAGTTCTTCTGCTGGGAT  | 106                        |
|                      | Reverse: CATTCTCTGTGTCCTGCGTG  |                            |
| <b><i>CD4</i></b>    | Forward: AGCAGAAAGTGAAACTCGTGG | 128                        |
|                      | Reverse: ACCAACTTCGGCTGATTGAG  |                            |
| <b><i>GADPH</i></b>  | Forward: AGATGGTGAAGGTCGGAGTG  | 200                        |
|                      | Reverse: CGTTCTCTGCCTTGACTGTG  |                            |

**Table S2.** Information of primers used for pyrosequencing assay.

| Gene          | DNA Methylation Sequencing                                                                                                                                                                           | Product length (bp) |
|---------------|------------------------------------------------------------------------------------------------------------------------------------------------------------------------------------------------------|---------------------|
| <i>JAK2</i>   | Forward: GTTTTGTTTATTGTAGAGAT<br>Reverse: GGGACACCGCTGATCGTTTAAACTAACTCACTCCCAACC<br>Sequencing: GATTGGTTATATAGAATTTGG<br>Assay: TTTYGGGAAAYGAATTGGYGTGTTYGGAGATTTTYGYGGT<br>GGTTTTTGGGYGTGAGYGGGYGG | 295                 |
| <i>STAT5A</i> | Forward: TTGATAGATGAGAAAATTGAG<br>Reverse: GGGACACCGCTGATCGTTTACTACCTCTAACAAACCATACAC<br>Sequencing: TTTATTTTTATTTTTTAGTTAT<br>Assay: TTTYGTTTTTTTTGTTTAGTAYGGTTTGYGGTAGTTTYGYGGGGT<br>YGTYG         | 325                 |
| <i>CD4</i>    | Forward: GTTGGGGGGAAGAGGGTATAG<br>Reverse: GGGACACCGCTGATCGTTTAAATCCCTTCAAAAAACCATATCTC<br>Sequencing: TTTATAGGTATTTTTATTTT<br>Assay:<br>TTYGTAYGGTTTTTATTAGTTTTTTTTTAGTTYGTYGYGGAT                  | 193                 |

**Table S3.** Correlation amongst nine CpG sites in the *JAK2* gene.

|      | CPG1     | CPG2     | CPG3     | CPG4     | CPG5         | CPG6     | CPG7     | CPG8     | CPG9*        |
|------|----------|----------|----------|----------|--------------|----------|----------|----------|--------------|
|      |          | 0.93     | 0.89     | 0.95     | 0.95         | 0.88     | 0.77     | 0.83     | 0.79         |
| CPG1 | .        | (0.0001) | (0.0001) | (0.0001) | (0.0001)     | (0.0001) | (0.01)   | (0.0001) | (0.0001)     |
|      | 0.93     |          | 0.93     | 0.91     | 0.92         | 0.89     | 0.87     | 0.92     | 0.79         |
| CPG2 | (0.0001) | .        | (0.0001) | (0.0001) | (0.0001)     | (0.0001) | (0.0001) | (0.0001) | (0.0001)     |
|      | 0.89     | 0.93     |          | 0.89     | 0.89         | 0.87     | 0.90     | 0.91     | 0.72         |
| CPG3 | (0.0001) | (0.0001) | .        | (0.0001) | (0.0001)     | (0.0001) | (0.0001) | (0.0001) | (0.0001)     |
|      | 0.95     | 0.91     | 0.89     |          | 0.94         | 0.98     | 0.71     | 0.73     | 0.77         |
| CPG4 | (0.0001) | (0.0001) | (0.0001) | .        | (0.0001)     | (0.0001) | (0.01)   | (0.0001) | (0.0001)     |
|      | 0.95     | 0.92     | 0.89     | 0.94     |              | 0.92     | 0.76     | 0.81     |              |
| CPG5 | (0.0001) | (0.0001) | (0.0001) | (0.0001) | .            | (0.0001) | (0.01)   | (0.0001) | 0.85(0.0001) |
|      | 0.88     | 0.89     | 0.87     | 0.98     | 0.92         |          | 0.76     | 0.79     | 0.89         |
| CPG6 | (0.0001) | (0.0001) | (0.0001) | (0.0001) | (0.0001)     | .        | (0.01)   | (0.0001) | (0.0004)     |
|      | 0.77     | 0.87     | 0.90     | 0.71     |              | 0.76     |          | 0.91     |              |
| CPG7 | (0.01)   | (0.0001) | (0.0001) | (0.01)   | 0.76 (0.01)  | (0.01)   | .        | (0.0001) | 0.37 (0.16)  |
|      | 0.83     | 0.92     | 0.91     | 0.73     | 0.81         | 0.76     | 0.91     |          |              |
| CPG8 | (0.0001) | (0.0001) | (0.0001) | (0.0001) | (0.0001)     | (0.01)   | (0.0001) | .        | 0.55 (0.05)  |
|      | 0.79     | 0.79     | 0.72     | 0.77     |              | 0.89     | 0.37     | 0.55     |              |
| CPG9 | (0.0001) | (0.0001) | (0.0001) | (0.0001) | 0.85(0.0001) | (0.0004) | (0.16)   | (0.05)   | .            |

\*The values in brackets ( ) show the *P* value.

**Table S4.** Correlation amongst seven CpG sites in the *STAT5A* gene.

|      | CpG1    | CpG2    | CpG3    | CpG4    | CpG5   | CpG6   | CpG7*  |
|------|---------|---------|---------|---------|--------|--------|--------|
|      |         | 0.93    | 0.92    | 0.95    | 0.85   | 0.83   | 0.81   |
| CpG1 | .       | (0.001) | (0.001) | (0.001) | (0.01) | (0.01) | (0.01) |
|      | 0.93    |         | 0.93    | 0.91    | 0.82   | 0.79   | 0.77   |
| CpG2 | (0.001) | .       | (0.001) | (0.001) | (0.01) | (0.01) | (0.01) |
|      | 0.92    | 0.93    |         | 0.91    | 0.81   | 0.79   | 0.72   |
| CpG3 | (0.001) | (0.001) | .       | (0.001) | (0.01) | (0.01) | (0.05) |
|      | 0.95    | 0.91    | 0.91    |         | 0.64   | 0.71   | 0.77   |
| CpG4 | (0.001) | (0.001) | (0.001) | .       | (0.15) | (0.05) | (0.05) |
|      | 0.85    | 0.82    | 0.81    | 0.64    |        | 0.82   | 0.69   |
| CpG5 | (0.01)  | (0.01)  | (0.01)  | (0.15)  | .      | (0.01) | (0.05) |
|      | 0.83    | 0.79    | 0.79    | 0.71    | 0.82   |        | 0.76   |
| CpG6 | (0.01)  | (0.01)  | (0.01)  | (0.05)  | (0.01) | .      | (0.01) |
|      | 0.81    | 0.77    | 0.72    | 0.77    | 0.69   | 0.76   |        |
| CpG7 | (0.01)  | (0.01)  | (0.05)  | (0.05)  | (0.05) | (0.01) | .      |

\*The values in brackets ( ) show the *P* value.

**Table S5.** Correlation amongst five CpG sites in the *CD4* gene.

|       | CpG1     | CpG2     | CpG3     | CpG4     | CpG5*    |
|-------|----------|----------|----------|----------|----------|
|       |          | 0.48     | 0.71     | 0.69     | 0.17     |
| CpG 1 | .        | (0.006)  | (0.0001) | (0.0001) | (0.34)   |
|       | 0.48     |          | 0.51     | 0.36     | 0.57     |
| CpG2  | (0.006)  | .        | (0.004)  | (0.05)   | (0.0009) |
|       | 0.71     | 0.51     |          | 0.86     | 0.44     |
| CpG3  | (0.0001) | (0.004)  | .        | (0.0001) | (0.01)   |
|       | 0.69     | 0.36     | 0.86     |          | 0.38     |
| CpG4  | (0.0001) | (0.05)   | (0.0001) | .        | (0.03)   |
|       | 0.17     | 0.57     | 0.44     | 0.38     |          |
| CpG5  | (0.34)   | (0.0009) | (0.01)   | (0.03)   | .        |

\*The values in brackets ( ) show the *P* value.
